# Supplementary material
Source: HighWire-hosted journal article supplement (https://bmjopen.bmj.com/content/12/4/e055015)
Supplement: inline-supplementary-material-1 [file inline-supplementary-material-1.pdf]

## Supplementary Materials

**Supplementary Materials for “A Longitudinal Evaluation of Treatment Patterns, Risk Factors and Outcomes in Patients with Cardiovascular Disease Treated with Lipid-Lowering Therapy in the United Kingdom”****Supplementary Figure 1:****Definition for Each Annual Cohort**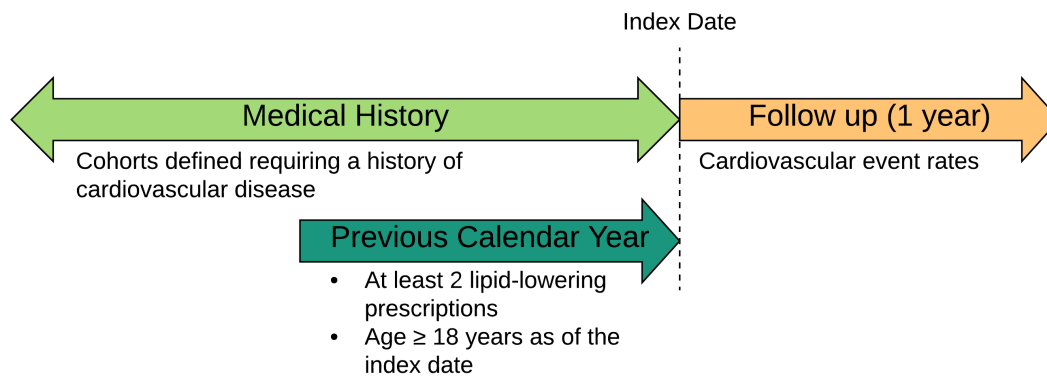**Notes:**

- Index date for all cohorts is defined as of January 1 of each year from 2008 to 2017.
- Lookback periods extend into prior years.
- Lipid-lowering prescription history is based on the previous calendar year.
- Medical history is based on all previous information.
- Follow-up is 1 year for CV event rates.

## Supplementary Materials

Supplementary Table 1: Cohort Attrition

| Processing Step                                            | 2008      | 2009      | 2010      | 2011      | 2012      | 2013      | 2014      | 2015      | 2016      | 2017      |
|------------------------------------------------------------|-----------|-----------|-----------|-----------|-----------|-----------|-----------|-----------|-----------|-----------|
| <b>Total Patients</b>                                      | 1,628,239 | 1,628,239 | 1,628,239 | 1,628,239 | 1,628,239 | 1,628,239 | 1,628,239 | 1,628,239 | 1,628,239 | 1,628,239 |
| <b>Available on January 1</b>                              | 1,050,490 | 1,037,918 | 1,021,587 | 990,511   | 954,263   | 919,929   | 849,966   | 752,156   | 610,655   | 502,000   |
| <b>Met Age Inclusion (≥ 18 years)</b>                      | 1,049,660 | 1,037,195 | 1,020,955 | 989,960   | 953,787   | 919,504   | 849,594   | 751,845   | 610,404   | 501,797   |
| <b>Received Lipid Lowering Therapy (≥ 2 prescriptions)</b> | 553,934   | 586,563   | 613,583   | 613,919   | 603,078   | 604,187   | 575,218   | 517,589   | 422,424   | 353,568   |
| <b>History of Documented CVD (Final Cohort)</b>            | 173,424   | 177,577   | 179,137   | 176,677   | 172,505   | 170,501   | 160,634   | 142,193   | 114,452   | 94,418    |

Note that “Total Patients” is not the count of patients in the complete CPRD database. It represents the patients available after extracting potentially eligible patients from the complete CPRD database.

## Supplementary Materials

Supplementary Table 2: Baseline Demographic and Clinical Characteristics of the 2008 through 2017 Documented CVD Cohorts

| Variable                             | 2008<br>(n =<br>173,424) | 2009<br>(n =<br>177,577) | 2010<br>(n =<br>179,137) | 2011<br>(n =<br>176,677) | 2012<br>(n =<br>172,505) | 2013<br>(n =<br>170,501) | 2014<br>(n =<br>160,634) | 2015<br>(n =<br>142,193) | 2016<br>(n =<br>114,452) | 2017<br>(n =<br>94,418) |
|--------------------------------------|--------------------------|--------------------------|--------------------------|--------------------------|--------------------------|--------------------------|--------------------------|--------------------------|--------------------------|-------------------------|
| Age (years)                          | 71.6 (10.7)              | 71.9 (10.8)              | 72.2 (10.9)              | 72.3 (10.9)              | 72.5 (11.0)              | 72.6 (11.0)              | 72.8 (11.0)              | 72.8 (11.1)              | 72.8 (11.1)              | 72.5 (11.1)             |
| Male (%)                             | 59.9%                    | 60.5%                    | 60.8%                    | 61.1%                    | 61.4%                    | 61.9%                    | 62.2%                    | 62.5%                    | 62.8%                    | 63.1%                   |
| Body Mass Index (kg/m <sup>2</sup> ) | 28.1 (5.0)               | 28.2 (5.1)               | 28.3 (5.1)               | 28.4 (5.2)               | 28.5 (5.2)               | 28.5 (5.3)               | 28.5 (5.3)               | 28.6 (5.3)               | 28.7 (5.4)               | 28.8 (5.4)              |
| Smoking                              | 15.1%                    | 15.0%                    | 14.9%                    | 15.2%                    | 15.0%                    | 15.1%                    | 15.1%                    | 14.3%                    | 14.1%                    | 13.9%                   |
| Type 2 Diabetes                      | 18.4%                    | 19.0%                    | 19.5%                    | 20.2%                    | 20.6%                    | 21.0%                    | 21.4%                    | 21.4%                    | 21.9%                    | 22.4%                   |
| Chronic Kidney Disease Stage 3-5     | 22.4%                    | 24.1%                    | 24.9%                    | 25.1%                    | 24.9%                    | 24.7%                    | 24.6%                    | 23.9%                    | 23.6%                    | 22.8%                   |
| Hypertension                         | 95.3%                    | 92.2%                    | 95.0%                    | 94.9%                    | 94.7%                    | 94.8%                    | 94.7%                    | 94.4%                    | 94.3%                    | 94.0%                   |
| Myocardial Infarction (MI)           | 22.5%                    | 22.9%                    | 23.4%                    | 23.9%                    | 24.5%                    | 25.1%                    | 25.4%                    | 25.8%                    | 26.6%                    | 27.4%                   |

## Supplementary Materials

|                                   |           |           |           |           |           |           |           |           |           |           |
|-----------------------------------|-----------|-----------|-----------|-----------|-----------|-----------|-----------|-----------|-----------|-----------|
| <b>Ischemic Stroke (IS)</b>       | 5.5%      | 5.8%      | 6.2%      | 6.6%      | 7.0%      | 7.2%      | 7.3%      | 7.4%      | 7.6%      | 7.9%      |
| <b>Total Cholesterol (mmol/L)</b> | 4.2 (0.9) | 4.2 (0.9) | 4.2 (0.9) | 4.2 (0.9) | 4.2 (0.9) | 4.2 (0.9) | 4.2 (0.9) | 4.1 (0.9) | 4.1 (0.9) | 4.1 (1.0) |
| <b>LDL Cholesterol (mmol/L)</b>   | 2.2 (0.8) | 2.2 (0.8) | 2.2 (0.8) | 2.2 (0.8) | 2.2 (0.8) | 2.2 (0.8) | 2.1 (0.8) | 2.1 (0.8) | 2.1 (0.8) | 2.1 (0.8) |
| <b>HDL Cholesterol (mmol/L)</b>   | 1.3 (0.4) | 1.3 (0.4) | 1.3 (0.4) | 1.3 (0.4) | 1.3 (0.4) | 1.3 (0.4) | 1.3 (0.4) | 1.3 (0.4) | 1.3 (0.4) | 1.3 (0.4) |

## Supplementary Materials

Supplementary Table 3: Baseline Demographic and Clinical Characteristics of the 2008 through 2017 MI Subset

| Variable                                | 2008<br>(n =<br>38,999) | 2009<br>(n =<br>40,624) | 2010<br>(n =<br>41,895) | 2011<br>(n =<br>42,239) | 2012<br>(n =<br>42,277) | 2013<br>(n =<br>42,744) | 2014<br>(n =<br>40,764) | 2015<br>(n =<br>36,697) | 2016<br>(n =<br>30,421) | 2017<br>(n =<br>25,900) |
|-----------------------------------------|-------------------------|-------------------------|-------------------------|-------------------------|-------------------------|-------------------------|-------------------------|-------------------------|-------------------------|-------------------------|
| Age (years)                             | 70.1<br>(11.7)          | 70.3<br>(11.8)          | 70.5<br>(11.9)          | 70.6<br>(11.9)          | 70.7<br>(12.0)          | 70.8<br>(12.0)          | 70.8<br>(11.9)          | 70.9<br>(11.9)          | 70.7<br>(11.9)          | 70.4<br>(11.7)          |
| Male (%)                                | 68.7%                   | 69.2%                   | 69.3%                   | 69.6%                   | 69.8%                   | 70.2%                   | 70.5%                   | 70.7%                   | 71.1%                   | 70.9%                   |
| Body Mass Index<br>(kg/m <sup>2</sup> ) | 28.0 (4.9)              | 28.1 (4.9)              | 28.2 (5.0)              | 28.3 (5.0)              | 28.4 (5.1)              | 28.5 (5.2)              | 28.6 (5.2)              | 28.6 (5.2)              | 28.7 (5.3)              | 28.9 (5.4)              |
| Smoking                                 | 16.5%                   | 16.6%                   | 16.6%                   | 16.9%                   | 16.7%                   | 16.6%                   | 16.7%                   | 16.0%                   | 15.5%                   | 15.2%                   |
| Type 2 Diabetes                         | 17.7%                   | 18.3%                   | 18.6%                   | 19.2%                   | 19.7%                   | 20.1%                   | 20.8%                   | 21.1%                   | 21.4%                   | 21.9%                   |
| Chronic Kidney<br>Disease Stage 3-5     | 23.3%                   | 24.5%                   | 25.4%                   | 25.3%                   | 25.1%                   | 24.7%                   | 24.4%                   | 23.6%                   | 23.1%                   | 22.1%                   |
| Hypertension                            | 98.2%                   | 98.1%                   | 98.1%                   | 98.3%                   | 98.3%                   | 98.3%                   | 98.2%                   | 98.3%                   | 98.2%                   | 98.1%                   |
| Myocardial<br>Infarction (MI)           | 100%                    | 100%                    | 100%                    | 100%                    | 100%                    | 100%                    | 100%                    | 100%                    | 100%                    | 100%                    |
| Ischemic Stroke (IS)                    | 1.7%                    | 1.8%                    | 1.9%                    | 2.0%                    | 2.1%                    | 2.2%                    | 2.2%                    | 2.2%                    | 2.2%                    | 2.2%                    |

**Supplementary Materials**

---

|                                       |           |           |           |           |           |           |           |           |           |           |
|---------------------------------------|-----------|-----------|-----------|-----------|-----------|-----------|-----------|-----------|-----------|-----------|
| <b>Total Cholesterol<br/>(mmol/L)</b> | 4.1 (0.9) | 4.1 (0.9) | 4.1 (0.9) | 4.1 (0.9) | 4.1 (0.9) | 4.1 (0.9) | 4.0 (0.9) | 4.0 (0.9) | 4.0 (0.9) | 4.0 (1.0) |
| <b>LDL Cholesterol<br/>(mmol/L)</b>   | 2.1 (0.7) | 2.1 (0.7) | 2.1 (0.7) | 2.1 (0.7) | 2.1 (0.8) | 2.1 (0.8) | 2.1 (0.7) | 2.0 (0.8) | 2.0 (0.8) | 2.0 (0.8) |
| <b>HDL Cholesterol<br/>(mmol/L)</b>   | 1.3 (0.4) | 1.2 (0.4) | 1.2 (0.4) | 1.2 (0.4) | 1.3 (0.4) | 1.3 (0.4) | 1.3 (0.4) | 1.3 (0.4) | 1.2 (0.4) | 1.2 (0.4) |
